# Supplementary material
Source: publisher figshare collection journal article supplement (https://acs.figshare.com/ndownloader/files/3624399)
Supplement: Supplementary file 1 [file 3624399]

## Appendix

Table 1. ASTM methods and MIL specifications used in this study.

| Name           | Title                                                                                                               |
|----------------|---------------------------------------------------------------------------------------------------------------------|
| ASTM D4625     | Standard Test Method for Distillate Fuel Storage Stability at 43°C (110°F)                                          |
| ASTM D5304     | Standard Test Method for Assessing Middle Distillate Fuel Storage Stability by Oxygen Overpressure                  |
| ASTM D2274     | Standard Test Method for Oxidation Stability of Distillate Fuel Oil (Accelerated Method)                            |
| ASTM D445      | Standard Test Method for Kinematic Viscosity of Transparent and Opaque Liquids and Calculation of Dynamic Viscosity |
| ASTM D3703     | Standard Test Method for Hydroperoxide Number of Aviation Turbine Fuels, Gasoline and Diesel Fuels                  |
| ASTM D4809     | Standard Test Method for Heat of Combustion of Liquid Hydrocarbon Fuels by Bomb Calorimeter (Precision Method)      |
| ASTM D974      | Standard Test Method for Acid and Base Number by Color-Indicator Titration                                          |
| MIL-DTL-16884N | Detail Specification Fuel, Naval Distillate for NATO F-76                                                           |
